# Supplementary material for: Ferroelectricity, ionic conductivity and structural paths for large cation migration in Ca10.5−xPbx(VO4)7single crystals,x= 1.9, 3.5, 4.9
Source: Royal Society of Chemistry journal article supplement (doi:10.1039/c8ce01843j), 2019-01-01
Supplement: c8ce01843j6.pdf [file c8ce01843j6.pdf]

## Supporting information

### Ferroelectricity, ionic conductivity and structural paths for large cations migration in $\text{Ca}_{10.5-x}\text{Pb}_x(\text{VO}_4)_7$ single crystals, $x = 1.9, 3.5, 4.9$

Dina V. Deyneko, Daria A. Petrova, Sergey M. Aksenov, Sergey Yu. Stefanovich, Oksana V. Baryshnikova, Stanislav S. Fedotov, Peter C. Burns, Miron B. Kosmyna, Aleksey N. Shekhovtsov and Bogdan Lazoryak

**Table S1.** Structural parameters for single crystals  $\text{Ca}_{10-x}\text{Pb}_x(\text{VO}_4)_7$ .

| <b>Crystal data</b>                               |                                                        |                                                        |                                                        |
|---------------------------------------------------|--------------------------------------------------------|--------------------------------------------------------|--------------------------------------------------------|
| Formula                                           | $\text{Ca}_{8.6}\text{Pb}_{1.9}(\text{VO}_4)_7$        | $\text{Ca}_7\text{Pb}_{3.5}(\text{VO}_4)_7$            | $\text{Ca}_{5.6}\text{Pb}_{4.9}(\text{VO}_4)_7$        |
| Formula weight (g)                                | 1534.7                                                 | 1813.1                                                 | 2043.2                                                 |
| Temperature (K)                                   | 120                                                    | 120                                                    | 120                                                    |
| Cell setting                                      |                                                        | Trigonal                                               |                                                        |
| Space group                                       | $R3c$                                                  | $R3c$                                                  | $R3c$                                                  |
| Lattice Parameters                                |                                                        |                                                        |                                                        |
| $a$ (Å)                                           | 10.9220(2)                                             | 10.9801(9)                                             | 11.0594(1)                                             |
| $c$ (Å)                                           | 38.3133 (9)                                            | 38.5568(1)                                             | 38.8813(1)                                             |
| $V$ (Å <sup>3</sup> )                             | 3958.1(1)                                              | 4025.7(3)                                              | 4118.5(4)                                              |
| $Z$                                               | 6                                                      | 6                                                      | 6                                                      |
| $D_x$ (g cm <sup>-3</sup> )                       | 3.8632                                                 | 4.4874                                                 | 4.9429                                                 |
| Crystal size (mm)                                 | 0.24×0.22×0.15                                         | 0.21×0.23×0.26                                         | 0.35×0.30×0.28                                         |
| Crystal form                                      |                                                        | Anhedral grain                                         |                                                        |
| Crystal color                                     | Light Yellow                                           | Pink                                                   | Red                                                    |
| <b>Data Collection</b>                            |                                                        |                                                        |                                                        |
| Diffractometer                                    |                                                        | Bruker Smart Apex II                                   |                                                        |
| Radiation; $\lambda$                              |                                                        | $\text{MoK}_\alpha$ ; 0.71069                          |                                                        |
| Absorption coefficient, $\mu$ (mm <sup>-1</sup> ) | 15.92                                                  | 25.737                                                 | 33.304                                                 |
| $F(000)$                                          | 4259                                                   | 4877                                                   | 5390                                                   |
| Data range $\theta$ (°);                          | 4.06 – 56.22                                           | 2.39 – 30.69                                           | 2.37– 30.59                                            |
| Limits $h, k, l$                                  | $-22 < h < 25$ ,<br>$-25 < k < 24$ ,<br>$-78 < l < 88$ | $-15 < h < 15$ ,<br>$-15 < k < 15$ ,<br>$-54 < l < 54$ | $-15 < h < 15$ ,<br>$-15 < k < 15$ ,<br>$-54 < l < 54$ |
| No. of measured reflections                       | 69638                                                  | 16900                                                  | 17106                                                  |
| Total reflections/unique                          | 5507 / 3621                                            | 1388 / 1294                                            | 1414 / 1208                                            |
| Criterion for observed reflections                |                                                        | $I > 2\sigma(I)$                                       |                                                        |
| <b>Refinement</b>                                 |                                                        |                                                        |                                                        |
| Refinement on                                     | Full-matrix least squares on $F$                       |                                                        |                                                        |
| $R_1, wR_2$ (all reflection)                      | 4.55 / 3.68                                            | 4.56 / 3.47                                            | 4.72 / 3.78                                            |

|                                                        |                               |                                 |                               |
|--------------------------------------------------------|-------------------------------|---------------------------------|-------------------------------|
| No. of refinement parameters                           | 199                           | 163                             | 223                           |
| Weight scheme                                          | $1/(\sigma^2 F  + 0.0001F^2)$ | $1/(\sigma^2 F  + 0.001225F^2)$ | $1/(\sigma^2 F  + 0.0009F^2)$ |
| Max./min. residual $e$ density, ( $e\text{\AA}^{-3}$ ) | -2.34 / 1.91                  | -1.46 / 1.30                    | -1.62 / 2.89                  |
| GOF (Goodness of fit)                                  | 1.03                          | 1.01                            | 1.04                          |

Note:  $R_1 = \sum[|F_{\text{obs}}| - |F_{\text{calc}}|] / \sum|F_{\text{obs}}|$ ;  $wR_2 = \{\sum[w(F_{\text{obs}}^2 - F_{\text{calc}}^2)^2] / \sum[w(F_{\text{obs}}^2)^2]\}^{1/2}$ ;  $\text{GOF} = \{\sum[w(F_{\text{obs}}^2 - F_{\text{calc}}^2)] / (n - p)\}^{1/2}$  where  $n$  is a number of reflections and  $p$  is a number of refined parameters.

**Table S2.** Structural parameters for  $\text{Ca}_{8.6}\text{Pb}_{1.9}(\text{VO}_4)_7$  (**1**),  $\text{Ca}_7\text{Pb}_{3.5}(\text{VO}_4)_7$  (**2**) and  $\text{Ca}_{5.6}\text{Pb}_{4.9}(\text{VO}_4)_7$  (**3**) single crystals.

| Site            | Mult. | Sample | $x$        | $y$         | $z$         | $U_{\text{eq}}, \text{\AA}^2$ | Site occupancy                                           |
|-----------------|-------|--------|------------|-------------|-------------|-------------------------------|----------------------------------------------------------|
| M1              | 18    | 1      | 0.7208(8)  | -0.15557(8) | -0.0668(9)  | 0.0134(19)                    | $\text{Ca}^{2+}$                                         |
|                 |       | 2      | 0.0571(2)  | 0.5254(2)   | -0.4024(2)  | 0.0116(7)                     | 0.942(5) $\text{Ca}^{2+} + 0.058(5)$<br>$\text{Pb}^{2+}$ |
|                 |       | 3      | -0.2762(4) | -0.1424(3)  | -0.0685(3)  | 0.0141(6)                     | 0.750(6) $\text{Ca}^{2+} + 0.250(6)$<br>$\text{Pb}^{2+}$ |
| M2              | 18    | 1      | 0.8636(7)  | -0.27597(8) | 0.0688(9)   | 0.0127(18)                    | $\text{Ca}^{2+}$                                         |
|                 |       | 2      | 0.2801(2)  | 0.1264(2)   | -0.4340(2)  | 0.0207(7)                     | 0.900(2) $\text{Ca}^{2+} + 0.100(1)$<br>$\text{Pb}^{2+}$ |
|                 |       | 3      | -0.1293(3) | -0.2828(4)  | 0.0665(3)   | 0.0138(7)                     | 0.785(5) $\text{Ca}^{2+} + 0.215(5)$<br>$\text{Pb}^{2+}$ |
| M3 <sub>1</sub> | 18    | 1      | 0.5238(8)  | 0.0680(9)   | 0.0069(9)   | 0.0136(12)                    | 0.549(7) $\text{Ca}^{2+}$                                |
|                 |       | 2      | 0.7915(2)  | 0.1868(2)   | -0.3422(2)  | 0.0267(2)                     | 0.152(8) $\text{Ca}^{2+} + 0.848(8)$<br>$\text{Pb}^{2+}$ |
|                 |       | 3      | -0.5229(2) | -0.0637(4)  | -0.0083(3)  | 0.0302(6)                     | 0.921(7) $\text{Pb}^{2+}$                                |
| M3 <sub>2</sub> | 18    | 1      | 0.5172(2)  | 0.0598(3)   | 0.0063(9)   | 0.0308(4)                     | 0.451(3) $\text{Pb}^{2+}$                                |
|                 |       | 3      | 0.5363(4)  | 0.0696(7)   | 0.0045(8)   | 0.053(15)                     | 0.079(7) $\text{Pb}^{2+}$                                |
| M4 <sub>1</sub> | 6     | 1      | 0.3333(2)  | -0.3333(3)  | -0.0198(9)  | 0.0444(19)                    | 0.265(5) $\text{Pb}^{2+}$                                |
|                 |       | 2      | 0.0571(2)  | 0.5254(2)   | -0.4024(2)  | 0.0116(7)                     | 0.058(1) $\text{Pb}^{2+}$                                |
|                 |       | 3      | -0.3333(3) | 0.3333(5)   | 0.0150(3)   | 0.097(2)                      | 0.500(2) $\text{Pb}^{2+}$                                |
| M4 <sub>2</sub> | 6     | 1      | 0.3333(2)  | -0.333333   | -0.0103(9)  | 0.054(2)                      | 0.127(5) $\text{Pb}^{2+}$                                |
|                 |       | 2      | 0          | 0           | -0.3351(13) | 0.0220(2)                     | 0.126(3) $\text{Pb}^{2+}$                                |
| M4 <sub>3</sub> | 18    | 1      | 0.2571(3)  | -0.3540(18) | -0.0234(10) | 0.041(5)                      | 0.035(7) $\text{Pb}^{2+}$                                |
|                 |       | 2      | -0.0777(2) | -0.1020(2)  | -0.3114(13) | 0.0080(3)                     | 0.019(7) $\text{Pb}^{2+}$                                |
| M5              | 6     | 1      | 0          | 0           | 0           | 0.0185(2)                     | $\text{Ca}^{2+}$                                         |
|                 |       | 2      | 0          | 0           | 0           | 0.0126(8)                     |                                                          |
|                 |       | 3      | 0          | 0           | 0           | 0.0130(10)                    |                                                          |
| V1              | 6     | 1      | 0.6667(2)  | 0.3333(2)   | 0.0665(9)   | 0.0114(17)                    | V                                                        |
|                 |       | 2      | 0.6667(1)  | 0.3333(4)   | -0.4009(2)  | 0.0069(6)                     |                                                          |
|                 |       | 3      | -0.6666(6) | -0.3333(3)  | -0.0673(4)  | 0.0155(10)                    |                                                          |
| V2              | 18    | 1      | 0.8057(7)  | 0.1505(6)   | -0.0330(9)  | 0.0111(16)                    | V                                                        |
|                 |       | 2      | 0.17424(2) | 0.3167(2)   | -0.3670(2)  | 0.0087(6)                     |                                                          |
|                 |       | 3      | -0.1895(5) | 0.1611(5)   | -0.0331(3)  | 0.0120(9)                     |                                                          |
| V3              | 18    | 1      | 0.1930(8)  | -0.15921(7) | 0.0326(9)   | 0.0150(19)                    | V                                                        |
|                 |       | 2      | 0.4855(2)  | 0.0095(2)   | -0.3002(2)  | 0.0062(5)                     |                                                          |
|                 |       | 3      | -0.3445(7) | -0.1884(5)  | 0.0341(2)   | 0.0095(8)                     |                                                          |
| O11             | 6     | 1      | 0.6667(3)  | 0.3333(2)   | 0.0218(9)   | 0.0263(15)                    | O                                                        |
|                 |       | 2      | 0.6667(3)  | 0.3333(3)   | -0.3559(12) | 0.016(3)                      |                                                          |
|                 |       | 3      | -0.6667(6) | -0.3333(3)  | -0.0228(5)  | 0.009(3)                      |                                                          |
| O12             | 18    | 1      | 0.5207(3)  | 0.3416(4)   | 0.0794(9)   | 0.0258(11)                    | O                                                        |

|     |    |   |            |            |            |            |   |
|-----|----|---|------------|------------|------------|------------|---|
|     |    | 2 | 0.6733(8)  | 0.4857(8)  | -0.4133(2) | 0.022(3)   |   |
|     |    | 3 | -0.5211(1) | -0.3388(2) | -0.0795(5) | 0.034(5)   |   |
| O21 | 18 | 1 | 0.8066(3)  | 0.1757(4)  | 0.0111(9)  | 0.0214(10) | O |
|     |    | 2 | 0.1879(2)  | 0.2864(2)  | -0.3233(2) | 0.053(6)   |   |
|     |    | 3 | -0.2250(2) | 0.1534(2)  | 0.0096(4)  | 0.063(9)   |   |
| O22 | 18 | 1 | 0.8862(5)  | 0.3117(4)  | -0.0521(9) | 0.0355(16) | O |
|     |    | 2 | 0.0064(9)  | 0.2308(2)  | -0.3810(2) | 0.040(4)   |   |
|     |    | 3 | -0.1030(2) | 0.3252(1)  | -0.0476(4) | 0.045(7)   |   |
| O23 | 18 | 1 | 0.6353(4)  | 0.0385(4)  | -0.0449(9) | 0.0269(13) | O |
|     |    | 2 | 0.2880(8)  | 0.2774(7)  | -0.3881(2) | 0.014(3)   |   |
|     |    | 3 | -0.3434(1) | 0.0474(1)  | -0.0537(4) | 0.018(4)   |   |
| O24 | 18 | 1 | 0.9029(3)  | 0.0725(3)  | -0.0435(9) | 0.0185(9)  | O |
|     |    | 2 | 0.2418(8)  | 0.4920(9)  | -0.3742(2) | 0.022(3)   |   |
|     |    | 3 | -0.0845(2) | 0.0878(2)  | -0.0399(5) | 0.031(4)   |   |
| O31 | 18 | 1 | 0.3460(3)  | -0.0432(3) | 0.0551(9)  | 0.0173(9)  | O |
|     |    | 2 | 0.4053(7)  | -0.1659(7) | -0.2898(2) | 0.011(2)   |   |
|     |    | 3 | -0.4182(2) | -0.1031(2) | 0.0529(4)  | 0.034(6)   |   |
| O32 | 18 | 1 | 0.2455(7)  | -0.1418(5) | -0.0100(9) | 0.050(2)   | O |
|     |    | 2 | 0.3764(9)  | 0.0695(8)  | -0.2868(2) | 0.018(3)   |   |
|     |    | 3 | -0.4032(1) | -0.3537(1) | 0.0486(4)  | 0.027(4)   |   |
| O33 | 18 | 1 | 0.0821(3)  | -0.0930(4) | 0.0410(9)  | 0.0297(12) | O |
|     |    | 2 | 0.6463(2)  | 0.0881(2)  | -0.2802(2) | 0.029(3)   |   |
|     |    | 3 | -0.1697(2) | -0.0937(9) | 0.0441(5)  | 0.014(3)   |   |
| O34 | 18 | 1 | 0.1110(6)  | -0.3307(4) | 0.0459(9)  | 0.050(2)   | O |
|     |    | 2 | 0.5118(8)  | 0.0384(2)  | -0.3436(2) | 0.017(3)   |   |
|     |    | 3 | -0.3706(2) | -0.1936(2) | -0.0088(4) | 0.034(6)   |   |

**Table S3.** Anisotropic atomic displacement parameters ( $U_{ij}$ , Å<sup>2</sup>) for Ca<sub>8.6</sub>Pb<sub>1.9</sub>(VO<sub>4</sub>)<sub>7</sub> (**1**), Ca<sub>7.0</sub>Pb<sub>3.5</sub>(VO<sub>4</sub>)<sub>7</sub> (**2**) and Ca<sub>5.6</sub>Pb<sub>4.9</sub>(VO<sub>4</sub>)<sub>7</sub> (**3**) single crystals.

| Site                  | Sample | $U_{11}$   | $U_{22}$   | $U_{33}$   | $U_{12}$   | $U_{13}$    | $U_{23}$    |
|-----------------------|--------|------------|------------|------------|------------|-------------|-------------|
| <i>M1</i>             | 1      | 0.0139(2)  | 0.0130(2)  | 0.0116(2)  | 0.0053(2)  | -0.0030(19) | -0.0006(19) |
|                       | 2      | 0.0136(9)  | 0.0140(9)  | 0.0081(10) | 0.0075(6)  | -0.0001(5)  | -0.0005(5)  |
|                       | 3      | 0.0157(8)  | 0.0154(8)  | 0.0138(8)  | 0.0097(6)  | -0.0006(5)  | 0.0005(6)   |
| <i>M2</i>             | 1      | 0.0112(2)  | 0.0140(2)  | 0.0117(2)  | 0.0055(19) | -0.0008(17) | -0.0004(18) |
|                       | 2      | 0.0220(8)  | 0.0232(8)  | 0.0177(8)  | 0.0119(7)  | -0.0048(6)  | -0.0041(6)  |
|                       | 3      | 0.0141(8)  | 0.0158(9)  | 0.0138(9)  | 0.0092(7)  | 0.0017(9)   | 0.0032(6)   |
| <i>M3<sub>1</sub></i> | 1      | 0.0091(11) | 0.029(2)   | 0.0064(11) | 0.0122(13) | 0.0079(7)   | 0.0091(8)   |
|                       | 2      | 0.0243(3)  | 0.0232(3)  | 0.0164(3)  | -0.0002(2) | -0.0020(3)  | -0.0090(3)  |
|                       | 3      | 0.0229(5)  | 0.0488(10) | 0.0242(5)  | 0.0218(6)  | 0.0080(7)   | 0.0066(6)   |
| <i>M3<sub>2</sub></i> | 1      | 0.0288(5)  | 0.0462(6)  | 0.0250(4)  | 0.0246(5)  | 0.0103(3)   | 0.0085(4)   |
|                       | 3      | 0.036(9)   | 0.11(3)    | 0.035(8)   | 0.051(14)  | 0.024(6)    | 0.040(11)   |
| <i>M4<sub>1</sub></i> | 1      | 0.053(3)   | 0.053(3)   | 0.0271(14) | 0.0265(14) | 0           | 0           |
|                       | 2      | 0.0538(19) | 0.0538(19) | 0.034(3)   | 0.0269(9)  | 0           | 0           |
|                       | 3      | 0.082(2)   | 0.082(2)   | 0.126(5)   | 0.0412(11) | 0           | 0           |
| <i>M4<sub>2</sub></i> | 1      | 0.051(10)  | 0.019(3)   | 0.036(5)   | 0.004(4)   | 0.013(6)    | -0.004(2)   |
|                       | 2      | 0.014(2)   | 0.014(2)   | 0.038(5)   | 0.0068(10) | 0           | 0           |
| <i>M4<sub>3</sub></i> | 1      | 0.0245(15) | 0.0245(15) | 0.114(7)   | 0.0122(8)  | 0           | 0           |
|                       | 2      | 0.023(2)   | 0.013(2)   | 0.026(5)   | 0.0071(10) | 0           | 0           |
| <i>M5</i>             | 1      | 0.0235(3)  | 0.0235(3)  | 0.0085(4)  | 0.0118(16) | 0           | 0           |
|                       | 2      | 0.0175(10) | 0.0175(10) | 0.0027(13) | 0.0088(5)  | 0           | 0           |
|                       | 3      | 0.0167(12) | 0.0167(12) | 0.0058(16) | 0.0083(6)  | 0           | 0           |
| <i>V1</i>             | 1      | 0.0105(20) | 0.0105(20) | 0.0131(3)  | 0.0052(10) | 0           | 0           |
|                       | 2      | 0.0068(7)  | 0.0068(7)  | 0.0071(13) | 0.0034(4)  | 0           | 0           |
|                       | 3      | 0.0109(11) | 0.0109(11) | 0.025(2)   | 0.0054(5)  | 0           | 0           |
| <i>V2</i>             | 1      | 0.0135(2)  | 0.0121(19) | 0.0099(18) | 0.0083(16) | -0.0006(15) | 0.0008(15)  |
|                       | 2      | 0.0068(7)  | 0.0102(7)  | 0.0062(7)  | 0.0020(6)  | -0.0013(6)  | -0.0057(6)  |
|                       | 3      | 0.0155(12) | 0.0115(11) | 0.0081(10) | 0.0060(10) | -0.0001(12) | 0.0030(12)  |
| <i>V3</i>             | 1      | 0.0208(3)  | 0.0114(2)  | 0.0129(2)  | 0.0080(2)  | -0.0039(2)  | 0.0006(17)  |
|                       | 2      | 0.0085(7)  | 0.0042(7)  | 0.0036(7)  | 0.0013(6)  | -0.0008(6)  | -0.0002(5)  |
|                       | 3      | 0.0047(10) | 0.0142(11) | 0.0070(10) | 0.0027(8)  | 0.0017(8)   | 0.0019(12)  |
| <i>O11</i>            | 1      | 0.0313(19) | 0.0313(19) | 0.016(2)   | 0.0156(10) | 0           | 0           |

|     |   |            |            |            |            |             |             |
|-----|---|------------|------------|------------|------------|-------------|-------------|
|     | 2 | 0.019(4)   | 0.019(4)   | 0.009(6)   | 0.009(2)   | 0           | 0           |
|     | 3 | 0.025(4)   | 0.025(5)   | 0.019(4)   | 0.0188(10) | 0           | 0           |
| O12 | 1 | 0.0212(13) | 0.0203(13) | 0.0400(18) | 0.0135(12) | 0.0069(12)  | -0.0054(12) |
|     | 2 | 0.020(4)   | 0.016(4)   | 0.035(5)   | 0.013(3)   | 0.013(3)    | 0.014(3)    |
|     | 3 | 0.019(5)   | 0.034(6)   | 0.053(7)   | 0.015(5)   | -0.006(5)   | -0.017(6)   |
| O21 | 1 | 0.0232(13) | 0.0236(13) | 0.0110(10) | 0.0069(11) | -0.0011(9)  | 0.0004(9)   |
|     | 2 | 0.026(5)   | 0.093(11)  | 0.012(4)   | 0.009(6)   | -0.008(4)   | -0.007(5)   |
|     | 3 | 0.106(15)  | 0.049(9)   | 0.025(7)   | 0.031(10)  | 0.015(8)    | 0.000(6)    |
| O22 | 1 | 0.050(2)   | 0.0256(17) | 0.0291(16) | 0.0180(17) | 0.0015(16)  | 0.0132(13)  |
|     | 2 | 0.009(4)   | 0.066(7)   | 0.017(4)   | -0.001(4)  | 0.001(3)    | -0.020(4)   |
|     | 3 | 0.095(11)  | 0.024(6)   | 0.011(5)   | 0.026(7)   | -0.018(6)   | -0.004(4)   |
| O23 | 1 | 0.0166(12) | 0.041(2)   | 0.0212(13) | 0.0133(13) | -0.0089(10) | -0.0105(13) |
|     | 2 | 0.026(4)   | 0.012(3)   | 0.012(3)   | 0.017(3)   | 0.001(3)    | 0.001(2)    |
|     | 3 | 0.008(4)   | 0.036(6)   | 0.012(4)   | 0.011(4)   | 0.008(3)    | 0.014(4)    |
| O24 | 1 | 0.0165(11) | 0.0189(12) | 0.0257(13) | 0.0131(10) | -0.0015(9)  | -0.0035(9)  |
|     | 2 | 0.021(4)   | 0.018(4)   | 0.035(5)   | 0.015(3)   | -0.012(3)   | -0.010(4)   |
|     | 3 | 0.004(4)   | 0.026(6)   | 0.053(8)   | 0.001(4)   | -0.001(5)   | 0.014(5)    |
| O31 | 1 | 0.0152(10) | 0.0229(12) | 0.0165(10) | 0.0116(10) | -0.0045(8)  | -0.0017(9)  |
|     | 2 | 0.016(3)   | 0.002(3)   | 0.011(3)   | 0.001(2)   | -0.004(2)   | -0.003(2)   |
|     | 3 | 0.038(7)   | 0.047(7)   | 0.036(7)   | 0.037(6)   | 0.002(6)    | -0.003(6)   |
| O32 | 1 | 0.091(4)   | 0.034(2)   | 0.0140(14) | 0.022(3)   | -0.0091(19) | -0.0021(13) |
|     | 2 | 0.027(4)   | 0.021(4)   | 0.016(4)   | 0.020(3)   | 0.001(3)    | -0.002(3)   |
|     | 3 | 0.034(6)   | 0.018(5)   | 0.013(5)   | 0.000(5)   | -0.004(4)   | 0.000(4)    |
| O33 | 1 | 0.0157(12) | 0.0254(15) | 0.048(2)   | 0.0101(12) | 0.0001(12)  | 0.0181(14)  |
|     | 2 | 0.019(4)   | 0.033(5)   | 0.023(4)   | 0.004(3)   | -0.014(3)   | -0.007(4)   |
|     | 3 | 0.008(4)   | 0.013(4)   | 0.014(4)   | 0.000(3)   | 0.002(3)    | 0.002(4)    |
| O34 | 1 | 0.082(4)   | 0.0149(14) | 0.0321(19) | 0.0089(18) | -0.019(2)   | 0.0072(13)  |
|     | 2 | 0.024(4)   | 0.023(4)   | 0.006(3)   | 0.013(3)   | 0.005(3)    | 0.001(3)    |
|     | 3 | 0.047(8)   | 0.038(7)   | 0.008(5)   | 0.015(6)   | -0.010(5)   | -0.005(5)   |

**Table S4.** The main interatomic distances, Å for (1), (2) and (3) crystals.

| Bond                  |                 | 1            |              | 2            |              | 3            |    |
|-----------------------|-----------------|--------------|--------------|--------------|--------------|--------------|----|
|                       |                 | Ca           | Pb           | Ca           | Pb           | Ca           | Pb |
| <i>M1</i>             | O12             | 2.412(2)     |              | 2.508(7)     |              | 2.520(6)     |    |
|                       | O31             | 2.362(3)     |              |              |              | 2.310(2)     |    |
|                       | O34             | 2.390(4)     |              | 2.441(7)     |              | 2.491(5)     |    |
|                       | O32             | 2.440(4)     |              | 2.380(6)     |              | 2.378(2)     |    |
|                       | O33             |              |              | 2.281(5)     |              |              |    |
|                       | O24             | 2.502(1)     |              | 2.4846       |              | 2.525(1)     |    |
|                       | O24'            | 2.450(2)     |              | 2.6061       |              | 2.610(6)     |    |
|                       | O23             | 2.833(2)     |              | 2.564(7)     |              | 2.617(2)     |    |
|                       | O22             | 2.844(1)     |              | 3.107(0)     |              | 3.038(4)     |    |
|                       | < <i>M1-O</i> > | <b>2.530</b> |              | <b>2.547</b> |              | <b>2.561</b> |    |
| <i>M2</i>             | O21             | 2.380(4)     |              | 2.380(6)     |              | 2.410(2)     |    |
|                       | O23             | 2.410(4)     |              | 2.401(5)     |              | 2.418(2)     |    |
|                       | O22             | 2.321(4)     |              | 2.411(6)     |              | 2.439(2)     |    |
|                       | O12             | 2.506(2)     |              | 2.440(2)     |              | 2.455(5)     |    |
|                       | O31             | 2.524(1)     |              | 2.444(5)     |              | 2.816(3)     |    |
|                       | O31'            |              |              | 2.518(1)     |              |              |    |
|                       | O33             | 2.460(6)     |              | 2.821(1)     |              | 2.503(2)     |    |
|                       | O33'            | 2.587(1)     |              |              |              | 2.536(1)     |    |
|                       | O34             | 3.169(4)     |              |              |              |              |    |
|                       | O32             |              |              | 2.808(5)     |              | 2.811(1)     |    |
| < <i>M2-O</i> >       | <b>2.545</b>    |              | <b>2.488</b> |              | <b>2.511</b> |              |    |
| <i>M3<sub>1</sub></i> | O23             | 2.431(4)     | 2.420(4)     | 2.450(5)     |              | 2.475(4)     |    |
|                       | O31             | 2.509(6)     | 2.481(1)     |              |              | 2.774(4)     |    |
|                       | O11             | 2.576(2)     | 2.658(2)     | 2.637(1)     |              | 2.645(1)     |    |
|                       | O34             | 2.633(2)     | 2.612(1)     | 2.662(2)     |              | 2.706(1)     |    |
|                       | O34'            |              |              | 2.742(1)     |              | 2.734(2)     |    |
|                       | O22             | 2.655(1)     | 2.636(1)     | 2.627(1)     |              | 2.650(1)     |    |
|                       | O21             | 2.659(1)     | 2.672(1)     | 2.898(2)     |              | 3.032(1)     |    |
|                       | O21'            | 2.705(1)     | 2.762(2)     |              |              |              |    |
|                       | O32             | 2.819(1)     | 2.741(2)     | 2.573(1)     |              | 2.645(1)     |    |
|                       | O33             |              |              | 2.775(4)     |              |              |    |

|                       |                      |              |              |              |
|-----------------------|----------------------|--------------|--------------|--------------|
|                       | O12                  |              |              | 3.117(3)     |
|                       | <M3-O>               | <b>2.623</b> | <b>2.670</b> | <b>2.753</b> |
| <i>M3<sub>2</sub></i> | O23                  | 2.420(4)     |              | 2.330(4)     |
|                       | O31                  | 2.481(1)     |              | 2.898(3)     |
|                       | O11                  | 2.658(2)     |              |              |
|                       | O34                  | 2.612(1)     |              | 3.573(7)     |
|                       | O34'                 |              |              | 3.421(7)     |
|                       | O22                  | 2.636(1)     |              | 2.470(5)     |
|                       | O21                  | 2.672(1)     |              | 2.331(6)     |
|                       | O21'                 | 2.762(2)     |              | 3.010(7)     |
|                       | O32                  | 2.741(2)     |              | 2.469(6)     |
|                       | O33                  |              |              |              |
|                       | O12                  |              |              | 3.517(5)     |
|                       | <M3 <sub>2</sub> -O> | <b>2.623</b> |              | <b>2.961</b> |
| <i>M5</i>             | O33 × 3              | 2.290(3)     | 2.320(5)     | 2.337(2)     |
|                       | O24 × 3              | 2.311(3)     | 2.290(5)     | 2.292(2)     |
|                       | <M5-O>               | <b>2.301</b> | <b>2.305</b> | <b>2.314</b> |
| <i>M4<sub>1</sub></i> | O32 × 3              | 2.728(4)     |              |              |
|                       | O12 × 3              | 3.062(1)     | 3.136(2)     |              |
|                       | O21 × 3              |              | 2.781(5)     |              |
|                       | <M4 <sub>1</sub> -O> | <b>2.900</b> | <b>2.959</b> |              |
| <i>M4<sub>2</sub></i> | O32 × 3              | 2.703(1)     |              |              |
|                       | O34 × 3              | 3.256(3)     |              |              |
|                       | O21 × 3              |              | 2.8044       | 2.7971       |
|                       | O22 × 3              |              | 3.0629       |              |
|                       | O12 × 3              |              |              | 3.2505       |
|                       | <M4 <sub>2</sub> -O> | <b>2.980</b> | <b>2.934</b> | <b>3.024</b> |
| <i>M4<sub>3</sub></i> | O32                  | 2.438(1)     | 2.954(4)     | 2.468(5)     |
|                       | O32'                 | 2.505(1)     |              |              |
|                       | O12                  | 2.754(1)     | 2.787(2)     |              |
|                       | O12'                 | 2.915(4)     | 2.977(1)     |              |
|                       | O23                  | 3.106(4)     |              | 2.694(1)     |
|                       | O34                  | 3.172(2)     |              | 3.421(1)     |
|                       | O21                  |              | 2.356(1)     | 2.331(2)     |

|    |                                 |              |              |              |
|----|---------------------------------|--------------|--------------|--------------|
|    | O21'                            |              | 2.582(2)     | 3.010(4)     |
|    | O22                             |              | 3.094(2)     | 2.470(1)     |
|    | O31                             |              |              | 2.898(2)     |
|    | <b>&lt;M4<sub>3</sub>-O&gt;</b> | <b>2.815</b> | <b>2.792</b> | <b>2.756</b> |
| V1 | O11                             | 1.710(5)     | 1.740(7)     | 1.730(3)     |
|    | O12 × 3                         | 1.714(2)     | 1.710(2)     | 1.708(2)     |
|    | <b>&lt;V1-O&gt;</b>             | <b>1.713</b> | <b>1.725</b> | <b>1.714</b> |
| V2 | O24                             | 1.708(2)     | 1.704(2)     | 1.737(2)     |
|    | O21                             | 1.710(5)     | 1.740(7)     | 1.701(2)     |
|    | O23                             | 1.701(2)     | 1.721(3)     | 1.727(2)     |
|    | O22                             | 1.690(2)     | 1.680(2)     | 1.671(2)     |
|    | <b>&lt;V2-O&gt;</b>             | <b>1.702</b> | <b>1.711</b> | <b>1.709</b> |
| V3 | O33                             | 1.723(2)     | 1.710(3)     | 1.721(2)     |
|    | O31                             | 1.740(2)     | 1.718(2)     | 1.691(2)     |
|    | O34                             | 1.701(2)     | 1.701(7)     | 1.702(2)     |
|    | O32                             | 1.710(5)     | 1.710(2)     | 1.691(2)     |
|    | <b>&lt;V3-O&gt;</b>             | <b>1.718</b> | <b>1.710</b> | <b>1.701</b> |



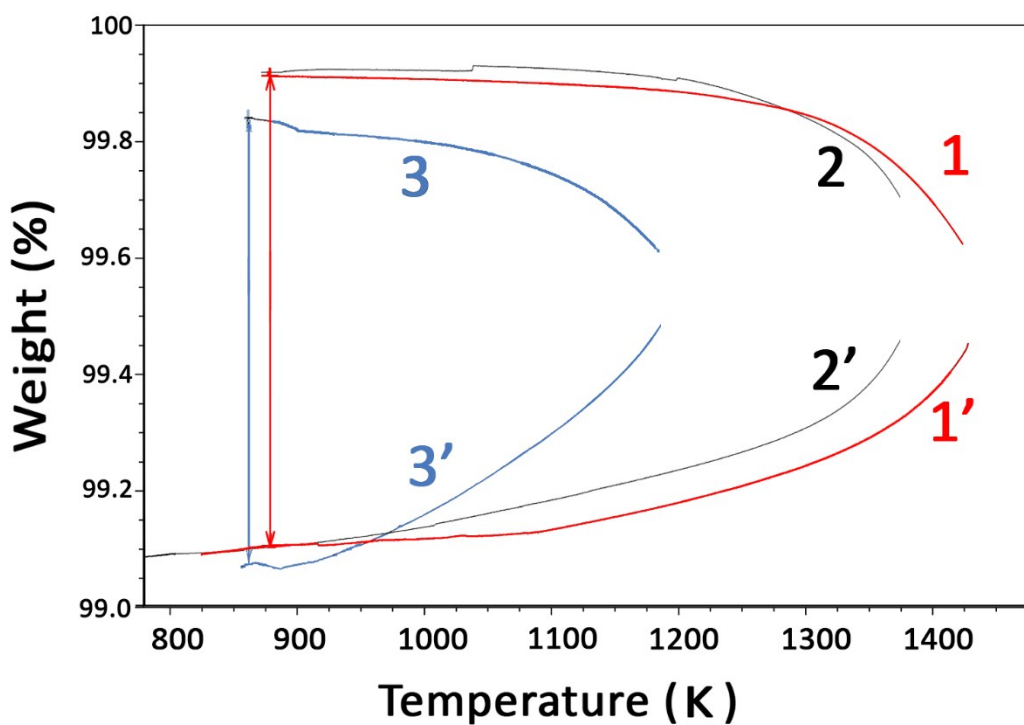

**Fig. S1.** Thermogravimetric curves for crystals (1), (2), and (3) in the heating (1, 2, 3)-cooling (1', 2', 3') circles.

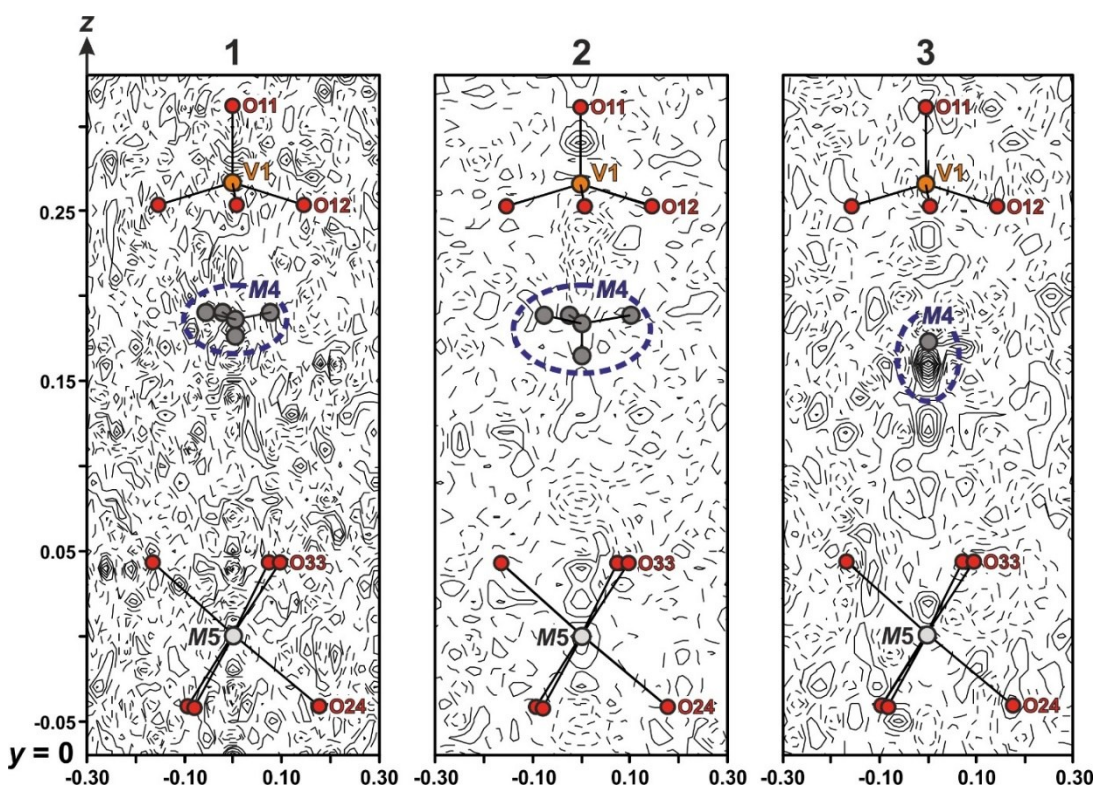

**Fig. S2.** The difference of electron density map around the  $M4$ -site in the structure of crystals (1), (2), and (3). The positive electron density is indicated by solid lines and the negative electron density is designated by dashed lines. Contour intervals are  $0.1 e\text{\AA}^{-3}$ .

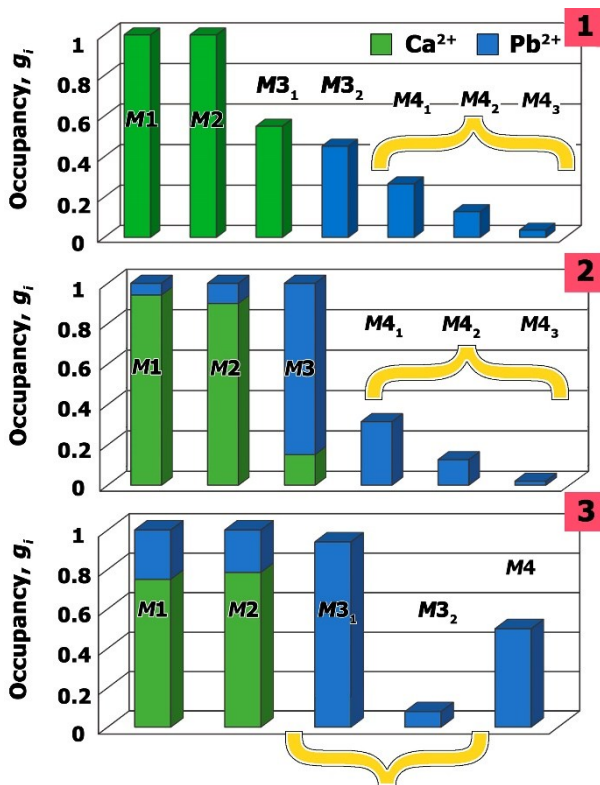

Fig. S3. Occupancy of the  $M(1-4)$  site by  $\text{Ca}^{2+}$  and  $\text{Pb}^{2+}$  in the crystal structures of (1), (2) and (3) crystals.

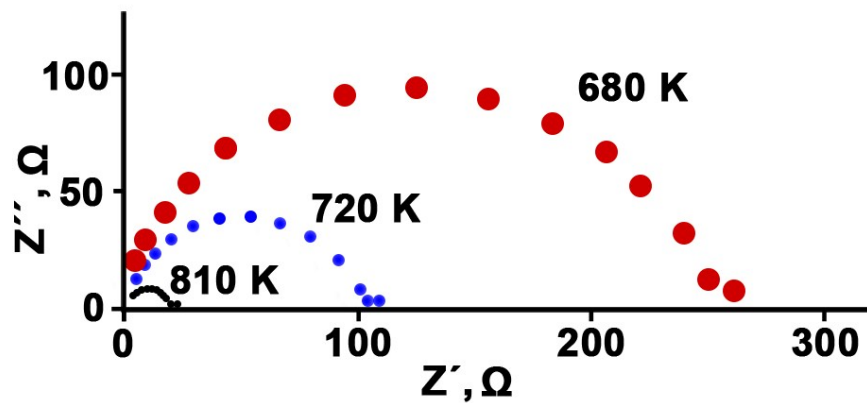

Fig. S4. Complex impedance plot of  $\text{Ca}_{5.6}\text{Pb}_{4.9}(\text{VO}_4)_7$  at selected temperatures, demonstrating absence of noticeable electronic contribution. The total electric conductivity values for the sample at 680, 720 and 810 K corresponds to  $(0.23; 0.6; 2.4) \cdot 10^{-3} \Omega^{-1}\text{cm}^{-1}$ , respectively.
