# Supplementary figures and images for: Ferroelectricity, ionic conductivity and structural paths for large cation migration in Ca10.5−xPbx(VO4)7single crystals,x= 1.9, 3.5, 4.9
Source: Royal Society of Chemistry journal article supplement (doi:10.1039/c8ce01843j), 2019-01-01

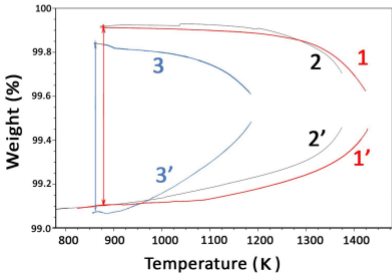

Supplement: c8ce01843j2.pdf [file c8ce01843j2.pdf]

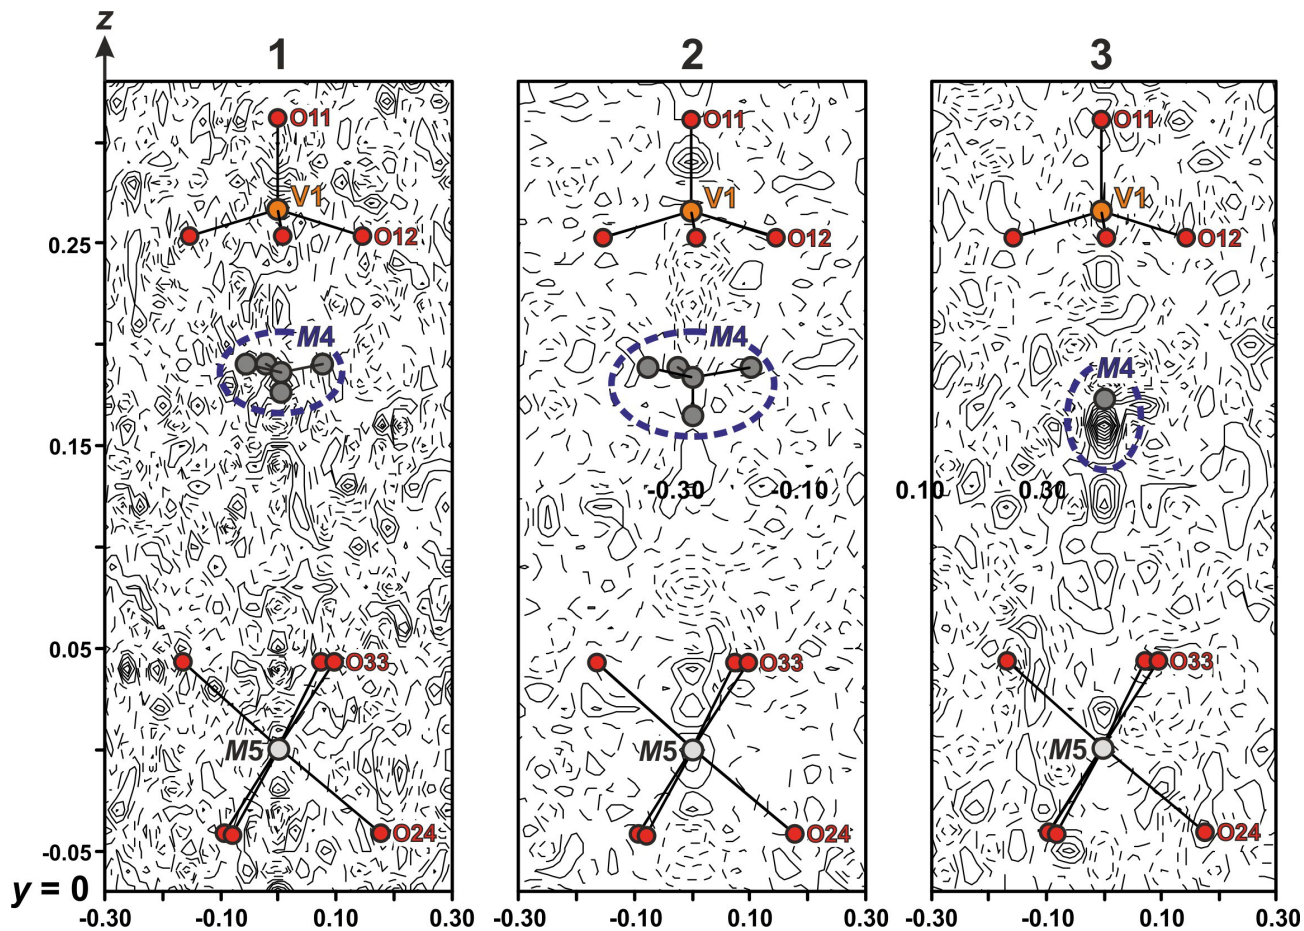

Supplement: c8ce01843j3.pdf [file c8ce01843j3.pdf]

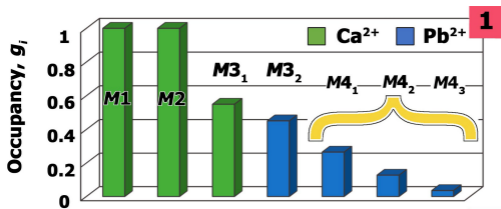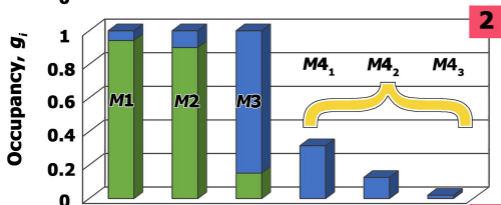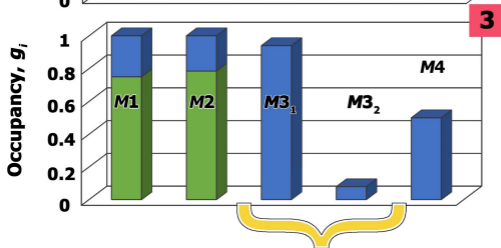

Supplement: c8ce01843j4.pdf [file c8ce01843j4.pdf]

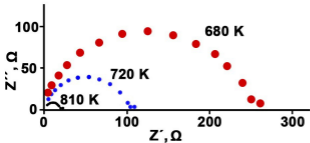

Supplement: c8ce01843j5.pdf [file c8ce01843j5.pdf]
